# Supplementary material for: Mechanistic insights into poly(C)-binding protein hnRNP K resolving i-motif DNA secondary structures
Source: PubMed Central journal article supplement (PMC9709238; doi:10.1016/j.jbc.2022.102670), 2022-11-02
Supplement: mmc1.pdf [file mmc1.pdf]

# Supporting Information

## Mechanistic insights into poly(C)-binding protein hnRNP K resolving i-motif

### DNA secondary structures

Wen-Qiang Wu<sup>†,\*</sup>, Xin Zhang<sup>†</sup>, Di Bai, Song-Wang Shan, Li-Jun Guo<sup>\*</sup>

From School of Life Sciences, Academy for Advanced Interdisciplinary Studies, State Key Laboratory of Crop Stress Adaptation and Improvement, School of Physics and Electronics, Henan University, Kaifeng 475001, China.

<sup>†</sup>These authors contributed equally to this work as Joint First Authors.

<sup>\*</sup>To whom correspondence should be addressed.

E-mail: wuwenqiang@henu.edu.cn (W.-Q. W), juneguo@henu.edu.cn (L.-J. G)

**Tables S1-S3**

**Figures S1-S7**

**Table S1.** Sequences of substrates used in the experiments.

| Name                                            | For figures                           | Sequences (5'-3') of substrates for CD                                                   |
|-------------------------------------------------|---------------------------------------|------------------------------------------------------------------------------------------|
| Py25                                            | Figure 1                              | TCCCCACCCTCCCCACCCTCCCC                                                                  |
| Py25(1245)                                      | Figures 1 and 2                       | TCCCCACCCTTTTTACCCTCCCC                                                                  |
| Py25(1234)                                      | Figures 1 and 2                       | TCCCCACCCTCCCCACCCTTTTT                                                                  |
| <b>Sequences (5'-3') of substrates for FRET</b> |                                       |                                                                                          |
| Py25'                                           | Figures 3, 4, 5, 9, S2, S3, S5 and S7 | <b>T</b> TCCCCACCCTCCCCACCCTCCCCATGAGGACACGTGCATTCC<br>Biotin-GGAATGCACGTG <b>T</b> CCTC |
| Py25(1245)'                                     | Figures 3, S2, S4 and S5              | <b>T</b> TCCCCACCCTTTTTACCCTCCCCATGAGGACACGTGCATTCC<br>Biotin-GGAATGCACGTG <b>T</b> CCTC |
| Py25(1234)'                                     | Figures 3 and S2                      | <b>T</b> TCCCCACCCTCCCCACCCTTTTTATGAGGACACGTGCATTCC<br>Biotin-GGAATGCACGTG <b>T</b> CCTC |
| Py25(1235)'                                     | Figure S2                             | <b>T</b> TCCCCACCCTCCCCATTTTCCCCATGAGGACACGTGCATTCC<br>Biotin-GGAATGCACGTG <b>T</b> CCTC |
| Py25(1345)'                                     | Figure S2                             | <b>T</b> TCCCCATTTTCCCCACCCTCCCCATGAGGACACGTGCATTCC<br>Biotin-GGAATGCACGTG <b>T</b> CCTC |
| Py25(2345)'                                     | Figure S2                             | <b>T</b> TTTTTACCCTCCCCACCCTCCCCATGAGGACACGTGCATTCC<br>Biotin-GGAATGCACGTG <b>T</b> CCTC |
| Py25(245)'                                      | Figures 6 and S6                      | <b>T</b> TTTTTACCCTTTTTACCCTCCCCATGAGGACACGTGCATTCC<br>Biotin-GGAATGCACGTG <b>T</b> CCTC |
| Py25(45)'                                       | Figures 7 and S6                      | <b>T</b> TTTTTATTTTTTTTACCCTCCCCATGAGGACACGTGCATTCC<br>Biotin-GGAATGCACGTG <b>T</b> CCTC |
| Py25(24)'                                       | Figures 7 and S6                      | <b>T</b> TTTTTACCCTTTTTACCCTTTTTATGAGGACACGTGCATTCC<br>Biotin-GGAATGCACGTG <b>T</b> CCTC |

Color: **Green, Cy3**; **Red, Cy5**. **Bold: C** sequences. Underline: dsDNA forming sequences.

**Table S2.** Kinetic parameters of hnRNP K resolving the Py25' i-motif at different protein concentrations using bulk fluorescence spectra obtained from the exponential fittings of the data shown in Figure 4C.

| Concentration | Unwinding amplitude of Cy3 (a.u.) | Rate constant (min <sup>-1</sup> ) | Unwinding rate (a.u. min <sup>-1</sup> ) |
|---------------|-----------------------------------|------------------------------------|------------------------------------------|
| 4 nM          | 1451.83 ± 270.29                  | 0.15 ± 0.06                        | 234.63 ± 126.82                          |
| 20 nM         | 2128.24 ± 183.29                  | 0.44 ± 0.10                        | 947.84 ± 287.51                          |
| 40 nM         | 2297.63 ± 319.21                  | 0.46 ± 0.16                        | 1115.41 ± 524.77                         |
| 200 nM        | 10134.70 ± 395.94                 | 0.36 ± 0.04                        | 3644.02 ± 525.37                         |
| 400 nM        | 10781.06 ± 618.93                 | 0.51 ± 0.07                        | 5605.80 ± 1113.23                        |
| 2 μM          | 16311.28 ± 359.88                 | 0.95 ± 0.05                        | 15547.74 ± 1162.93                       |
| 4 μM          | 16337.09 ± 1007.81                | 1.45 ± 0.25                        | 23869.24 ± 5579.11                       |

**Table S3.** Kinetic parameters of KH1-3 and hnRNP K resolving the Py25' i-motif at 1 μM protein, as obtained from exponential fittings of the data in Figure 9D.

| Protein | Unfolding percent | Rate constant (min <sup>-1</sup> ) | Unwinding rate (min <sup>-1</sup> ) |
|---------|-------------------|------------------------------------|-------------------------------------|
| KH1     | 11.22 ± 1.32      | 1.93 ± 0.55                        | 22.34 ± 8.74                        |
| KH2     | 53.11 ± 3.27      | 0.84 ± 0.12                        | 44.88 ± 9.27                        |
| KH3     | 48.46 ± 3.13      | 0.80 ± 0.12                        | 39.18 ± 8.53                        |
| hnRNP K | 80.48 ± 6.68      | 1.25 ± 0.24                        | 101.94 ± 27.57                      |

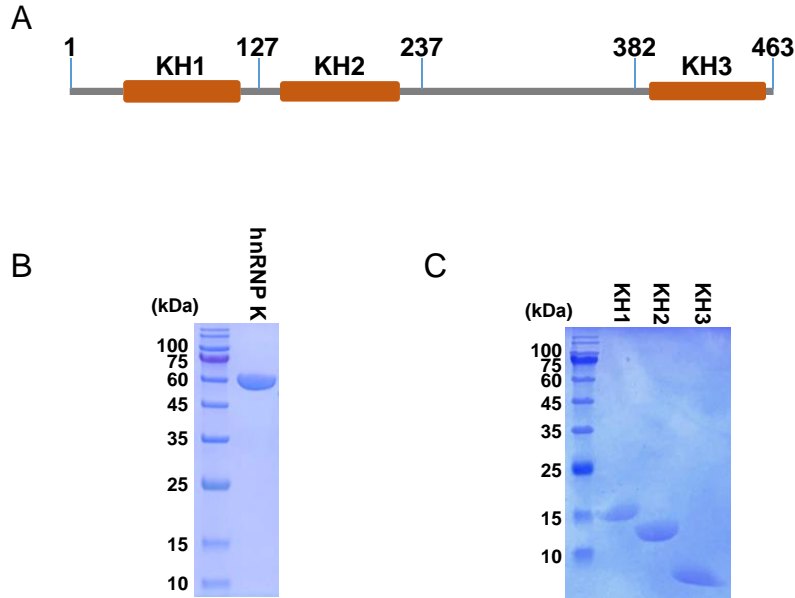

**Figure S1.** Domain architecture and purification. (A) Diagram of hnRNP K. (B, C) Analysis of the purified hnRNP K (B) and KH1-3 (C) by SDS-PAGE.

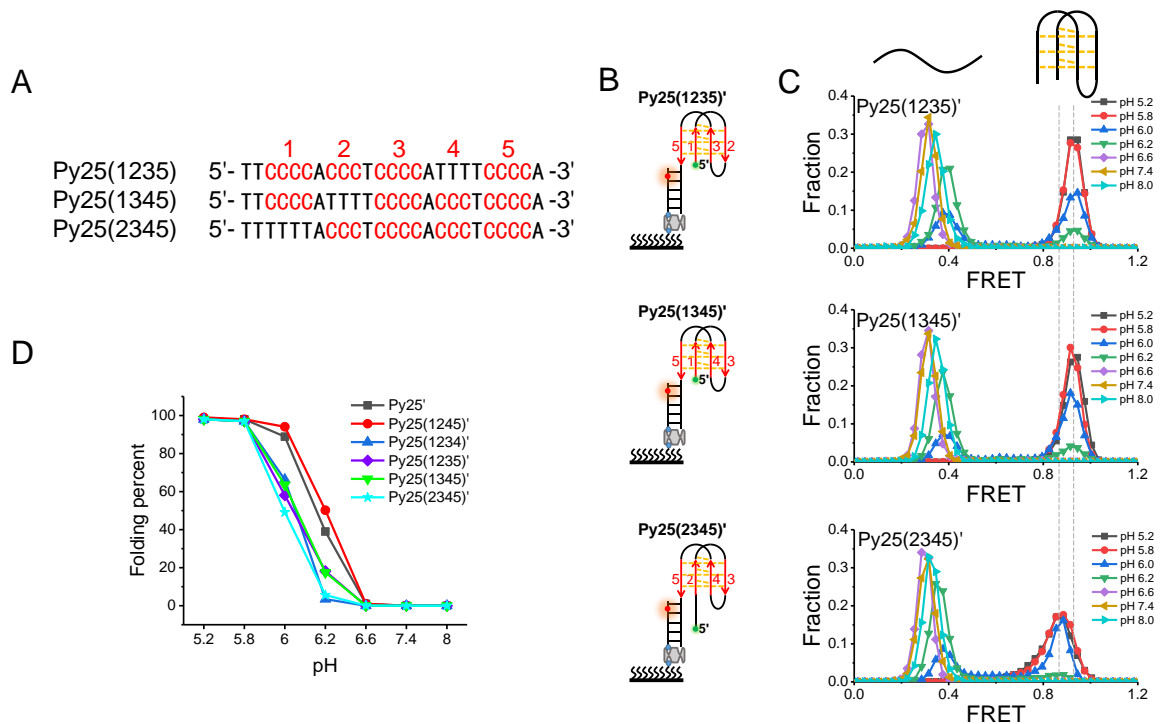

**Figure S2.** Folding of Py25(1235)', Py25(1345)', and Py25(2345)' at different pH levels from 5.2 to 8.0 using smFRET. (A) The sequences of Py25(1235)', Py25(1345)', and Py25(2345)'. (B, C) Schematic diagram and the FRET distributions at different pH of Py25(1235)', Py25(1345)', and Py25(2345)'. FRET values below 0.4 indicate ssDNA, and FRET values exceeding 0.8 indicate unfolded i-motif DNA (Figure 3). (D) Folding percentages of Py25', Py25(1245)', Py25(1234)', Py25(1235)', Py25(1345)', and Py25(2345)' at different pH values from 5.2 to 8.0, as derived from Figure 3 and (C).

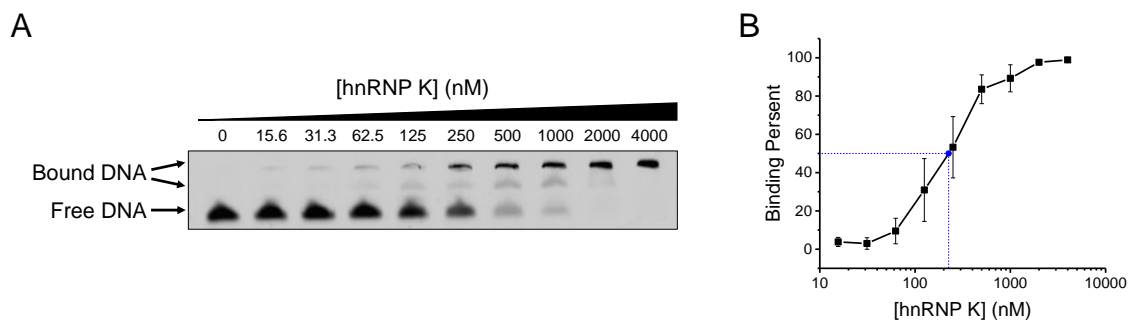

**Figure S3.** The binding of hnRNP K with Py25'. **(A)** Different concentrations of hnRNP K were mixed with 80 nM Py25', and PAGE bandshift assays determined the binding. **(B)** Quantitative analyses of hnRNP K binding Py25' by ImageJ (n = 3). The apparent DNA binding affinity value was approximately 220 nM.

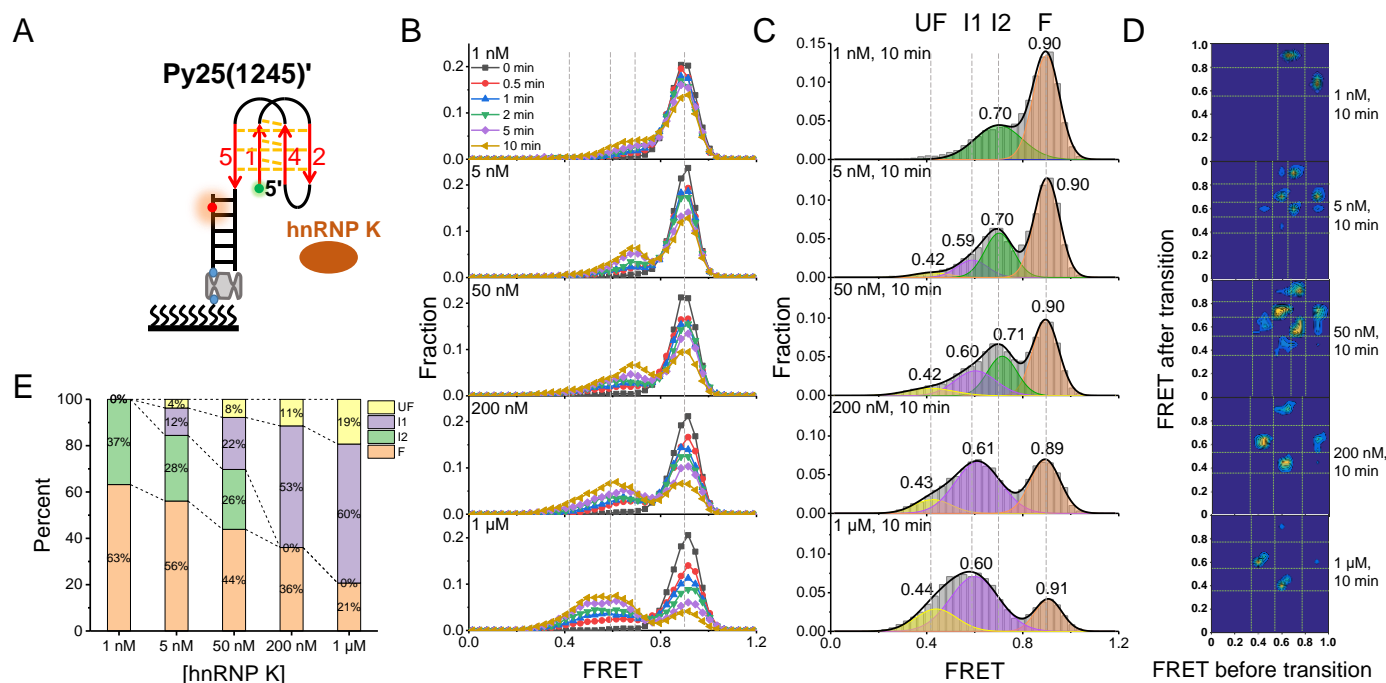

**Figure S4.** hnRNP K unfolding type-1245 i-motif DNA discretely revealed by single-molecule fluorescence resonance energy transfer (smFRET). **(A)** Schematic diagram of hnRNP K and Py25(1245)' i-motif DNA. **(B)** smFRET histograms obtained by adding 1 nM–1  $\mu$ M hnRNP K at series times from 0 to 10 min at pH 5.8. **(C)** Multipeak Gaussian distributions were used to fit the smFRET histograms at 10 min. The peak values are shown in the corresponding figures. **(D)** Transition density plots (TDPs) were used to show the state transitions of hnRNP K unfolding Py25(1245)' at 10 min and certain concentrations. **(E)** The fractions of the different folding structures at increasing concentrations of hnRNP K. UF, unfolded state; I1, intermediate state 1; I2, intermediate state 2; F, folded state.

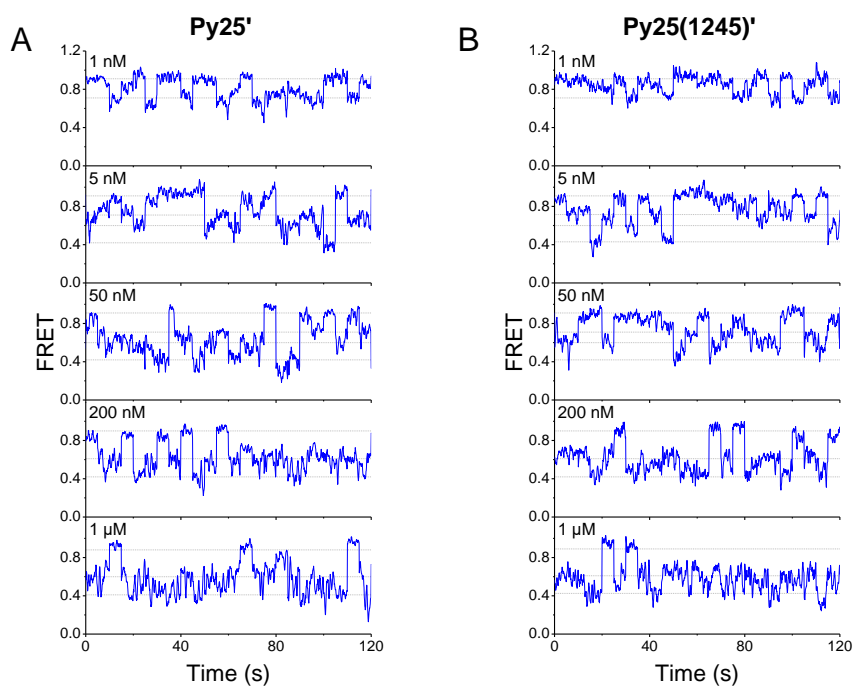

**Figure S5.** Representative single-molecule fluorescence resonance energy transfer (smFRET) traces of Py25' and Py25(1245)' measured at different concentrations of hnRNP K at pH 5.8.

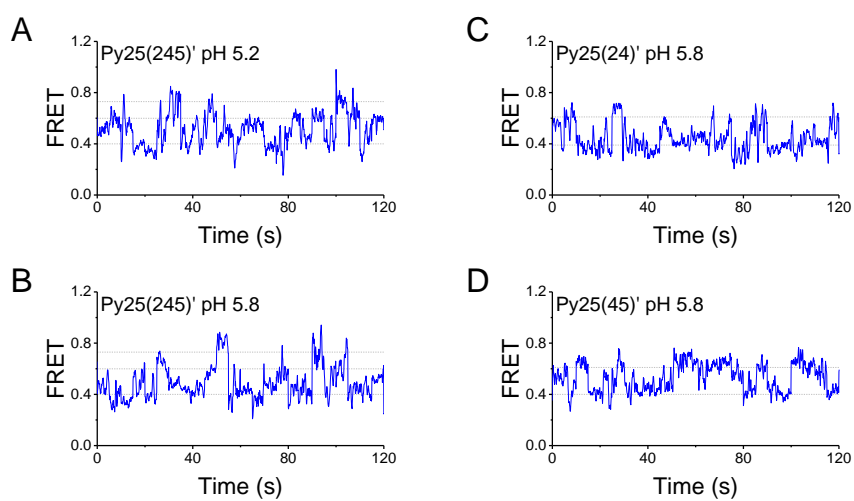

**Figure S6.** Representative single-molecule fluorescence resonance energy transfer (smFRET) traces of Py25(245)', Py25(24)', and Py25(45)' measured at corresponding pH values.

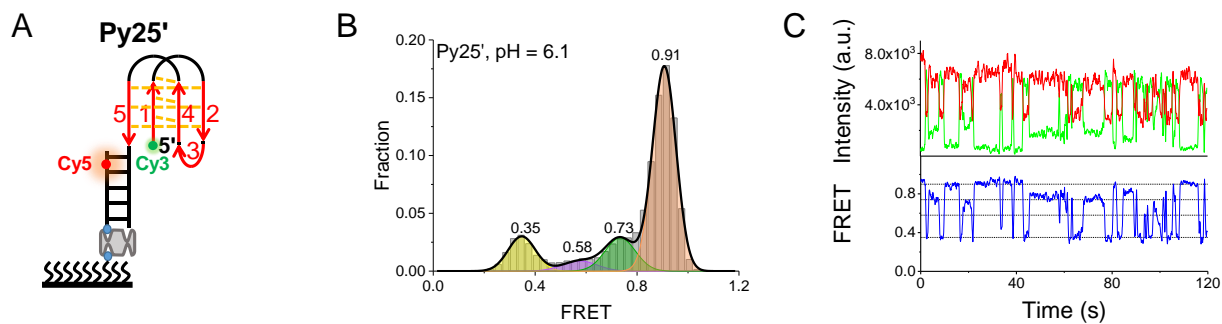

**Figure S7.** The folding of Py25' at pH 6.1. **(A)** Schematic diagram of Py25'. **(B)** FRET distributions of Py25' at pH 6.1. Multipeak Gaussian distributions were used to fit the smFRET histogram. **(C)** Representative time traces of fluorescence intensities of Cy3 and Cy5 (upper panel) and the corresponding FRET trace (lower panel).
